# Supplementary material for: Circadian activity of Culicoides oxystoma (Diptera: Ceratopogonidae), potential vector of bluetongue and African horse sickness viruses in the Niayes area, Senegal
Source: PubMed Central journal article supplement (PMC4513201; doi:10.1007/s00436-015-4534-8), 2015-05-24
Supplement: 436_2015_4534_MOESM1_ESM.pdf [file 436_2015_4534_MOESM1_ESM.pdf]

| Season                          | January     |             | April       |             | July        |             | October     |             |
|---------------------------------|-------------|-------------|-------------|-------------|-------------|-------------|-------------|-------------|
| Capture session                 | 1           | 2           | 1           | 2           | 1           | 2           | 1           | 2           |
| <i>C. oxystoma</i> (n)          | 5           | 0           | 39          | 261         | 76          | 11          | 2           | 24          |
| Temperature (°C) [min-max]      | [17.6-32.6] | [19.4-32.5] | [18.5-31.2] | [28.5-33.2] | [24.8-30.8] | [25.1-34.1] | [25.9-42.9] | [24.4-44.2] |
| Relative Humidity (%) [min-max] | [17.4-84.8] | [30.6-87.8] | [39.3-89.7] | [38.2-94.6] | [59.0-79.9] | [57.5-94.1] | [36.9-98.8] | [28.7-97.5] |
